# Supplementary material
Source: publisher figshare collection journal article supplement (https://acs.figshare.com/ndownloader/files/5198536)
Supplement: Supplementary file 1 [file 5198536]

**Supporting Information** For “Synthesis of Copper Nanowires via a Complex-Surfactant-Assisted Hydrothermal Reduction Process” by Zhaoping Liu, You Yang, Jianbo Liang, Zhaokang Hu, Shu Li, Sheng Peng, and Yitai Qian\*

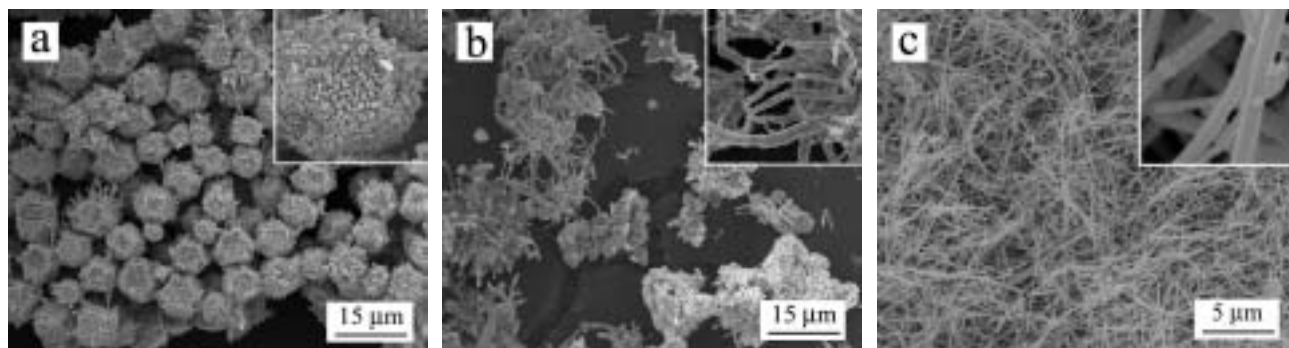

**SI-Figure 1.** FESEM images of three samples showing the variation of morphology when the concentration of SDBS was changed. (a) 0 mM; (b) 1.5 mM; (c) 9 mM. Other conditions were the same as those indicated in Figure 3. The local enlargement shows in the inset of each image.
